# Supplementary material
Source: PubMed Central journal article supplement (PMC1242302)

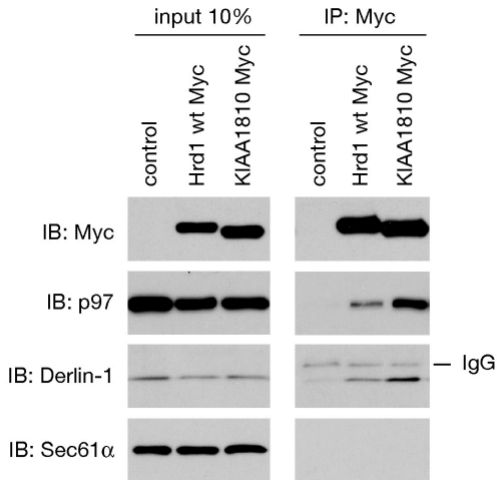

Supplement: pnas_0505006102_1.pdf [file pnas_0505006102_1.pdf]

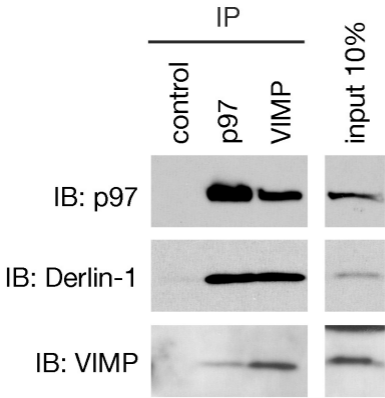

Supplement: pnas_0505006102_2.pdf [file pnas_0505006102_2.pdf]
